# Supplementary material
Source: publisher site journal article supplement (https://www.dovepress.com/article/344375)
Supplement: Supplementary file 1 [file get_supplementary_file.php]

## Appendix 1

1# "Fecal Incontinence" OR "Fecal Incontinence" OR "Incontinence, Fecal" OR "Bowel Incontinence" OR "Fecal Soiling" OR "Low anterior resection syndrome" OR "LARS" OR "Faecal incontinence" OR "Sphincter function" OR "Bowel function"

2# "Biofeedback" OR "BF"

3# "Colorectal Surgery" OR "Proctocolectomy" OR "Anal preservation" OR "Sphincter-sparing" OR "Sphincter-saving" OR "Sphincter sparing" OR "Sphincter saving" OR "Low anterior resection" OR "Anterior resection" OR "Intersphincteric resection" OR "Resection"

### Pubmed

```
((((((((((((((Fecal Incontinence[MeSH Terms]) OR (Fecal Incontinence)) OR (Incontinence, Fecal)) OR (Bowel Incontinence)) OR (Incontinence, Bowel)) OR (Fecal Soiling)) OR (Soilings, Fecal)) OR (Low anterior resection syndrome)) OR (Bowel dysfunction)) OR (Bowel function)) OR (Sphincter function)) OR (intestinal dysfunction)) OR (intestinal function)) AND ((biofeedback) OR (feedback))) AND (((((((((((((((Rectal Neoplasms[MeSH Terms]) OR (Rectal Neoplasms)) OR (Neoplasm, Rectal)) OR (Rectal Neoplasm)) OR (Rectum Neoplasms)) OR (Neoplasm, Rectum)) OR (Rectum Neoplasm)) OR (Rectal Tumors)) OR (Rectal Tumor)) OR (Tumor, Rectal)) OR (Neoplasms, Rectal)) OR (Cancer of Rectum)) OR (Rectum Cancers)) OR (Rectal Cancer)) OR (Cancer, Rectal)) OR (Rectal Cancers)) OR (Rectum Cancer)) OR (Cancer, Rectum)) OR (Cancer of the Rectum))
```

Conducted on 2020-6-18, number of hits: 130

### Embase

|                                  |                                                                                                                                                                                                                   |           |                                                                     |                            |
|----------------------------------|-------------------------------------------------------------------------------------------------------------------------------------------------------------------------------------------------------------------|-----------|---------------------------------------------------------------------|----------------------------|
| <input type="checkbox"/> History | Save   Delete   Print view   Export   Email                                                                                                                                                                       | Combine > | using <input checked="" type="radio"/> And <input type="radio"/> Or | <a href="#">^ Collapse</a> |
| <input type="checkbox"/> #4      | #1 AND #2 AND #3                                                                                                                                                                                                  |           |                                                                     | 101                        |
| <input type="checkbox"/> #3      | biofeedback OR feedback                                                                                                                                                                                           |           |                                                                     | 222,672                    |
| <input type="checkbox"/> #2      | 'rectum tumor'/exp OR 'rectum cancer'/exp OR 'rectum carcinoma'/exp                                                                                                                                               |           |                                                                     | 262,951                    |
| <input type="checkbox"/> #1      | 'feces incontinence'/exp OR (low AND anterior AND resection AND syndrome) OR (bowel AND dysfunction) OR (intestinal AND function) OR (sphincter AND function) OR (bowel AND function) OR (fecal AND incontinence) |           |                                                                     | 114,166                    |

Conducted on 2020-6-18, number of hits: 101

### Cochrane Library

|   |   |    |                                                                                                                                                                                                                              |   |      |        |       |
|---|---|----|------------------------------------------------------------------------------------------------------------------------------------------------------------------------------------------------------------------------------|---|------|--------|-------|
| - | + | #1 | Rectal Neoplasms                                                                                                                                                                                                             | S | MeSH | Limits | 2788  |
| - | + | #2 | fecal incontinence                                                                                                                                                                                                           |   |      | Limits | 1460  |
| - | + | #3 | Soilings, Fecal OR Fecal Soiling OR Incontinence, Fecal OR Bowel Incontinence OR Incontinence, Bowel OR low anterior resection syndrome OR bowel dysfunction OR bowel function OR intestinal function OR sphincter function) |   |      | Limits | 8144  |
| - | + | #4 | #2 OR #3                                                                                                                                                                                                                     |   |      | Limits | 8144  |
| - | + | #5 | (biofeedback OR feedback)                                                                                                                                                                                                    |   |      | Limits | 21050 |
| - | + | #6 | #1 AND #4 AND #5                                                                                                                                                                                                             |   |      | Limits | 14    |
| - | + | #7 | Type a search term or use the S or MeSH buttons to compose                                                                                                                                                                   | S | MeSH | Limits | N/A   |

Conducted on 2020-6-18, number of hits: 14

### ClinicalTrials.Gov

(rectal neoplasms OR rectal cancer) AND (biofeedback OR feedback)

Conducted on 2020-6-18, number of hits: 17

Appendix 2

**Basic information of literature**

**Review Title** \_\_\_\_\_

**Date** \_\_\_\_\_ **Reviewer** \_\_\_\_\_

**Study Title** \_\_\_\_\_

|                        |                        |
|------------------------|------------------------|
| First author           |                        |
| Year of publication    |                        |
| Country of publication |                        |
| Publication type       | Journal/Abstract/Other |
| Contact details        |                        |

**Eligibility of included studies**

|                                                                  |                           |
|------------------------------------------------------------------|---------------------------|
| Study type                                                       |                           |
| Patients with intestinal dysfunction after rectal cancer surgery | yes:                  no: |
| Biofeedback therapy                                              | yes:                  no: |
| <b>Note:</b>                                                     |                           |

**Characteristics of participants**

| Characteristics of participants      | Study |
|--------------------------------------|-------|
| Total number of participants         |       |
| Number of groups in the intervention |       |
| Number of groups in the              |       |

|                       |                                |                                                                                                                                                                                 |
|-----------------------|--------------------------------|---------------------------------------------------------------------------------------------------------------------------------------------------------------------------------|
| control group         |                                |                                                                                                                                                                                 |
| Participants          |                                | Age: Median___Average___Range___<br>Sex:<br>Other:                                                                                                                              |
| Intervention measures |                                | *Record the specific contents, methods, operation specifications, participants, time, frequency and cycle of intervention, and whether the participants have received training* |
| Control measures      |                                | *Record the specific contents, methods, operation specifications, participants, time, frequency and cycle of intervention, and whether the participants have received training* |
| Follow up time        |                                |                                                                                                                                                                                 |
| Outcomes              | Diagnostic criteria of disease | Evaluation of prognosis                                                                                                                                                         |

**Methods: Non randomized study quality assessment : (MINORS0)**

| Methodological items                                                                                                                                                                                                                                                                                                                                                                                                                                                                                                     | Score |
|--------------------------------------------------------------------------------------------------------------------------------------------------------------------------------------------------------------------------------------------------------------------------------------------------------------------------------------------------------------------------------------------------------------------------------------------------------------------------------------------------------------------------|-------|
| <p><b>1、 A clearly stated aim:</b> the question addressed should be precise and relevant in the light of available literature</p> <p><b>2、 Inclusion of consecutive patients:</b> all patients potentially fit for inclusion (satisfying the criteria for inclusion) have been included in the study during the study period (no exclusion or details about the reasons for exclusion)</p> <p><b>3、 Prospective collection of data:</b> data were collected according to a protocol established before the beginning</p> |       |

of the study

**4、 Endpoints appropriate to the aim of the study:**

unambiguous explanation of the criteria used to evaluate the main outcome which should be in accordance with the question addressed by the study. Also, the endpoints should be assessed on an intention-to-treat basis.

**5、 Unbiased assessment of the study endpoint:**

blind evaluation of objective endpoints and double-blind evaluation of subjective endpoints. Otherwise the reasons for not blinding should be stated

**6、 Follow-up period appropriate to the aim of the study:**

the follow-up should be sufficiently long to allow the assessment of the main endpoint and possible adverse events

**7、 Loss to follow up less than 5%:**

all patients should be included in the follow up. Otherwise, the proportion lost to follow up should not exceed the proportion experiencing the major endpoint

**8、 Prospective calculation of the study size:**

information of the size of detectable difference of interest with a calculation of 95% confidence interval, according to the expected incidence of the outcome event, and

|                                                                                                                                                                                                                                                                                                                                                                                                                                                                                                                                                                                                                                                                                                                                                                                                                                                                   |  |
|-------------------------------------------------------------------------------------------------------------------------------------------------------------------------------------------------------------------------------------------------------------------------------------------------------------------------------------------------------------------------------------------------------------------------------------------------------------------------------------------------------------------------------------------------------------------------------------------------------------------------------------------------------------------------------------------------------------------------------------------------------------------------------------------------------------------------------------------------------------------|--|
| <p>information about the level for statistical significance and estimates of power when comparing the outcomes</p> <p><b>9、 An adequate control group:</b> having a gold standard diagnostic test or therapeutic intervention recognized as the optimal intervention according to the available published data</p> <p><b>10、 Contemporary groups:</b> control and studied group should be managed during the same time period (no historical comparison)</p> <p><b>11、 Baseline equivalence of groups:</b> the groups should be similar regarding the criteria other than the studied endpoints. Absence of confounding factors that could bias the interpretation of the results</p> <p><b>12、 Adequate statistical analyses:</b> whether the statistics were in accordance with the type of study with calculation of confidence intervals or relative risk</p> |  |
|-------------------------------------------------------------------------------------------------------------------------------------------------------------------------------------------------------------------------------------------------------------------------------------------------------------------------------------------------------------------------------------------------------------------------------------------------------------------------------------------------------------------------------------------------------------------------------------------------------------------------------------------------------------------------------------------------------------------------------------------------------------------------------------------------------------------------------------------------------------------|--|

**Note: 0 (Not reported) 1 (Insufficient) 2 (Sufficient)**

### Results

|                        | Intervention group | Control group |
|------------------------|--------------------|---------------|
| Number                 |                    |               |
| Exclusion number       |                    |               |
| Number of observations |                    |               |

|                          |  |  |
|--------------------------|--|--|
| Number of lost follow-up |  |  |
| Number of events         |  |  |

|                                           |                    |      |                         |               |      |                         |
|-------------------------------------------|--------------------|------|-------------------------|---------------|------|-------------------------|
| Continuous variable (Before intervention) | Intervention group |      |                         | Control group |      |                         |
| Outcomes                                  | N                  | Mean | Standard deviation (SD) | N             | Mean | Standard deviation (SD) |
|                                           |                    |      |                         |               |      |                         |
|                                           |                    |      |                         |               |      |                         |
|                                           |                    |      |                         |               |      |                         |
| Continuous variable (After intervention)  | Intervention group |      |                         | Control group |      |                         |
| Outcomes                                  | N                  | Mean | Standard deviation (SD) | N             | Mean | Standard deviation (SD) |
|                                           |                    |      |                         |               |      |                         |
|                                           |                    |      |                         |               |      |                         |
|                                           |                    |      |                         |               |      |                         |
| Continuous                                | Intervention group |      |                         | Control group |      |                         |

|                      |   |      |                               |   |      |                               |
|----------------------|---|------|-------------------------------|---|------|-------------------------------|
| variable<br>(Change) |   |      |                               |   |      |                               |
| Outcomes             | N | Mean | Standard<br>deviation<br>(SD) | N | Mean | Standard<br>deviation<br>(SD) |
|                      |   |      |                               |   |      |                               |
|                      |   |      |                               |   |      |                               |
|                      |   |      |                               |   |      |                               |

### Appendix 3

1. Dubovyĭ, V.A. Biofeedback training in the treatment of anterior resection syndrome.

Lik Sprava 2006; (5-6): 55-60.

2. Fomenko O.Y, Kashnikov V. N, Alekseev M. V, et al. Rehabilitation program for patients with low anterior resection syndrome. Vopr Kurortol Fizioter Lech Fiz Kult. 2020; 97(5): 52-59.

3. Cohee W, Hurff A, Gazewood D, et al. Benign Anorectal Conditions: Evaluation and Management. Am Fam Physician. 2020; 101(1): 24-33.

4. Andromanakos N, Skandalakis P, Troupis T, et al. Constipation of anorectal outlet obstruction: pathophysiology, evaluation and management. J Gastroenterol Hepatol. 2006; 21(4): 638-646.

5. Andromanakos P, Filippou K, Pinis I, et al. Anorectal incontinence: A challenge in diagnostic and therapeutic approach. European Journal of Gastroenterology and

Hepatology 2013;25(11): 1247-1256.

6. Bartlett L, Sloots K, Nowak M, et al. Biofeedback for fecal incontinence: a randomized study comparing exercise regimens. *Dis Colon Rectum* 2011;54(7): 846-856.

7. Bartlett L, Sloots K, Nowak M, et al. Supplementary home biofeedback improves quality of life in younger patients with fecal incontinence. *Journal of Clinical Gastroenterology* 2015;49(5): 419-428.

8. Buhr J, Hoffmann W, Allemeyer E, et al. Clinical pathway for fecal incontinence—results in a 7-year follow-up. *Colorectal disease* 2019;21: 106.

9. Dalsgaard P, Emmertsen J, Juul T et al. Nurse-led personalized conservative treatment in patients with Low Anterior Resection Syndrome. *Colorectal disease* 2019;21: 112.

10. Dalsgaard P, Emmertsen J, Mekhael M, et al. Nurse-led standardized intervention for low anterior resection syndrome. A population-based pilot study. *Colorectal Dis* 2021;23(2): 434-443.

11. Ho H, Chiang M, Tan M, et al. Biofeedback therapy for excessive stool frequency and incontinence following anterior resection or total colectomy. *Dis Colon Rectum* 1996;39(11): 1289-1292.

12. Jarrett E, Matzel E, Stösser M, et al. Sacral nerve stimulation for faecal incontinence following a rectosigmoid resection for colorectal cancer. *Int J Colorectal Dis* 2005;20(5): 446-451.

13. Kang B, T.G. Lee, Muscle regeneration: Research for the treatment of fecal incontinence. *Journal of the Korean Society of Coloproctology* 2010;26(1): 1-7.



14.Rimmer C,Stackhouse K,Cruickshank N,et al.A targeted biofeedback programme improves functional outcome following low anterior resection.Colorectal disease.2012;14: 23.

15.Kim K,Jeon G,Song S,et al.Biofeedback Therapy Before Ileostomy Closure in Patients Undergoing Sphincter-Saving Surgery for Rectal Cancer: A Pilot Study. Ann Coloproctol 2015;31(4): 138-143.

16.Arnaud A,Fretes R,Joly A,et al.Posterior approach to the rectum for treatment of selected benign lesions.Int J Colorectal Dis 1991;6(2): 100-102.

17.Stackhouse K,Clarson E,Smith, J,et al.A targeted biofeedback programme improves functional outcome following low anterior resection.Colorectal disease 2018;20: 43.
